# Supplementary material
Source: publisher figshare collection journal article supplement (https://gsajournals.figshare.com/ndownloader/files/24491789)
Supplement: Supplementary file 1 [file 24491789]

## Sheet: Sheet1
	V. vulgaris	V. pensylvanica	V. germanica
Size	176 275 134	179 379 562	178 312 246
N50	8 304 510	8 532 720	8 396 154
N Count	4 147 610	444 951	1 783 864
Gaps	49 679	4 987	18 963
Gene Count	15 870	18 872	17 785
Complete BUSCOs	4202	4236	4068
Complete and single-copy BUSCOs	4190	3229	4060
Complete and duplicated BUSCOs	12	7	8
Fragmented BUSCOs	117	94	153
Missing BUSCOs	96	85	184
Total BUSCO groups Searched	4415	4415	4415
